# Supplementary material for: A New Instrument to Assess Children’s Understanding of Death: Psychometrical Properties of the EsCoMu Scale in a Sample of Spanish Children
Source: PubMed Central journal article supplement (PMC7916254; doi:10.3390/children8020125), 2021-02-09
Supplement: children-08-00125-s001.pdf [file children-08-00125-s001.pdf]

**Table S1.** Escala sobre el Concepto de Muerte (EsCoMu)

A continuación voy a realizarte algunas preguntas sobre qué crees que ocurre cuando nos morimos. Me gustaría que me contestaras a cada una de ellas respondiendo sí o no.

| <b>Dimensión 1. Universalidad</b>                   |                                                                             | Sí | No |
|-----------------------------------------------------|-----------------------------------------------------------------------------|----|----|
| U1                                                  | ¿Crees que tus abuelos morirán algún día?                                   |    |    |
| U2*                                                 | ¿Y una mamá, puede vivir siempre?                                           |    |    |
| U3                                                  | ¿Tú te puedes morir?                                                        |    |    |
| U4*                                                 | ¿Hay seres vivos que nunca se mueren?                                       |    |    |
| U5                                                  | ¿Todas las personas se mueren?                                              |    |    |
| U6                                                  | ¿Crees que alguien que sea muy bueno puede morir?                           |    |    |
| <b>Dimensión 2. Irreversibilidad</b>                |                                                                             | Sí | No |
| IR1*                                                | Si nos morimos, ¿alguien nos puede despertar?                               |    |    |
| IR2*                                                | ¿Un animal que ha muerto puede volver a vivir?                              |    |    |
| IR3*                                                | ¿Si alguien cercano a ti muriese podría volver a la vida?                   |    |    |
| IR4*                                                | ¿Si un niño muriese podría volver a vivir?                                  |    |    |
| IR5*                                                | ¿Alguien que muera puede volver a vivir si lo deseas con todas tus fuerzas? |    |    |
| IR6*                                                | ¿Puede revivir alguien que se ha muerto?                                    |    |    |
| IR7*                                                | ¿Crees que tras morir es posible volver a la vida?                          |    |    |
| <b>Dimensión 3. Cesación de procesos corporales</b> |                                                                             | Sí | No |
| CS1*                                                | Cuando alguien se muere, ¿puede tener frío?                                 |    |    |
| CS2*                                                | ¿Los animales tienen hambre o sed cuando se han muerto?                     |    |    |
| CS3*                                                | ¿Una persona que ha muerto se puede mover?                                  |    |    |
| CS4*                                                | ¿Alguien que ha muerto sigue respirando?                                    |    |    |
| CS5                                                 | ¿Cuando alguien muere su cuerpo deja de funcionar?                          |    |    |
| CS6*                                                | ¿Cuando un animal muere sigue teniendo ganas de jugar?                      |    |    |
| CS7*                                                | ¿Una persona que se ha muerto, puede oír o sentir?                          |    |    |

|      | <b>Dimensión 4. Causalidad</b>                        | Sí | No |
|------|-------------------------------------------------------|----|----|
| CA1  | ¿Una persona, se puede matar a sí misma?              |    |    |
| CA2  | ¿Las personas pueden morir de hambre o de sed?        |    |    |
| CA3  | ¿Alguien que se caiga desde mucha altura puede morir? |    |    |
| CA4* | ¿Se puede matar a alguien con la imaginación?         |    |    |
| CA5  | ¿Una persona se puede morir por ser ya muy mayor?     |    |    |
| CA6  | ¿Las personas pueden morir tras una larga enfermedad? |    |    |
| CA5  | ¿Puede una persona morir si tiene un accidente grave? |    |    |

Nota. \* Ítem inverso
